# Supplementary material for: Isolation of a gene cluster from Armillaria gallica for the synthesis of armillyl orsellinate–type sesquiterpenoids
Source: PubMed Central journal article supplement (PMC7778616; doi:10.1007/s00253-020-11006-y), 2020-11-16
Supplement: 253_2020_11006_MOESM1_ESM.pdf [file 253_2020_11006_MOESM1_ESM.pdf]

**Supplementary Material:**

**Applied Microbiology and Biotechnology**

**Isolation of a gene cluster from *Armillaria gallica* for the synthesis of armillyl orsellinate-type sesquiterpenoids**

**Benedikt Engels<sup>1,2</sup> · Uwe Heinig<sup>1,3</sup> · Christopher McElroy<sup>1</sup> · Reinhard Meusinger<sup>4</sup> · Torsten Grothe<sup>5</sup> · Marc Stadler<sup>6</sup> · Stefan Jennewein<sup>1\*</sup>**

<sup>1</sup> Fraunhofer Institute for Molecular Biology and Applied Ecology, Forckenbeckstrasse 6, 52074 Aachen, Germany.

<sup>2</sup> Present address: Jennewein Biotechnologie GmbH, Maarweg 32, Rheinbreitbach, Germany.

<sup>3</sup> Present address: Department of Plant & Environmental Sciences, Weizmann Institute of Science, P.O. Box 26, 7610001 Rehovot, Israel.

<sup>4</sup> Clemens Schöpf Institute of Organic Chemistry and Biochemistry, Technical University of Darmstadt, 64287 Darmstadt, Germany.

<sup>5</sup> Mibelle Group Biochemistry, Bolimattstrasse 1, 5033 Buchs, Switzerland.

<sup>6</sup> Department of Microbial Drugs, Helmholtz Centre for Infection Research, Inhoffenstrasse 7, 38124 Braunschweig, Germany.

\* To whom correspondence should be addressed: Fraunhofer Institute for Molecular Biology and Applied Ecology, Forckenbeckstrasse 6, 52074 Aachen, Germany; email: stefan.jennewein@ime.fraunhofer.de; phone: +49 241 6085 12121; fax: +49 241 6085 10000

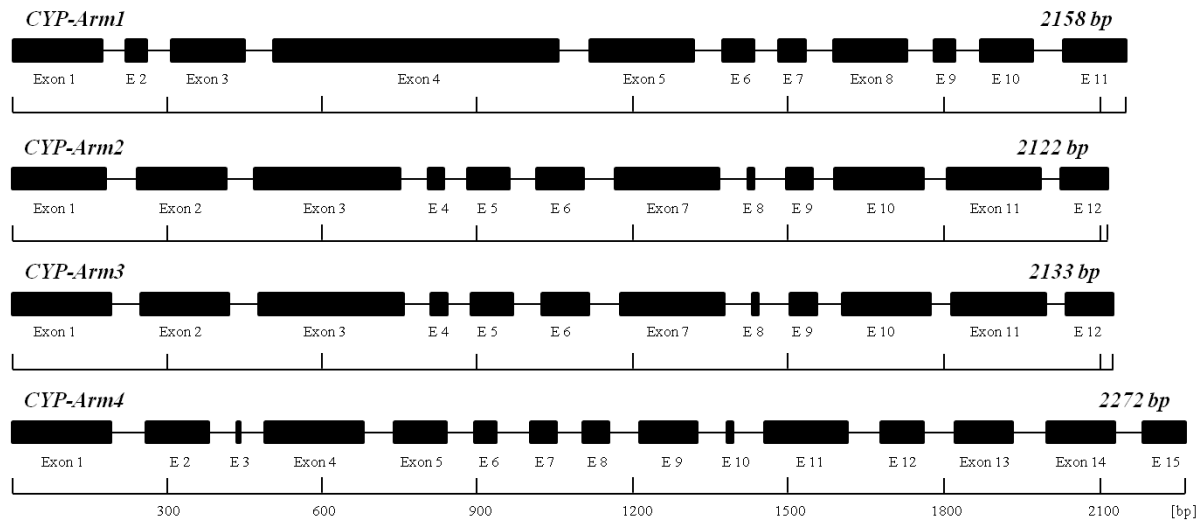

**Figure S1.** Schematic representation of the *A. gallica* cytochrome P450 monooxygenase genes *CYP-Arm1*, *CYP-Arm2*, *CYP-Arm3* and *CYP-Arm4*. Coding sequences (exons) are shown as black boxes and intervening introns as lines. *CYP-Arm2* and *CYP-Arm3* have an identical intron–exon structure. *CYP-Arm4* contains the most exons, one of which (exon 3) is only 4 bp in length.

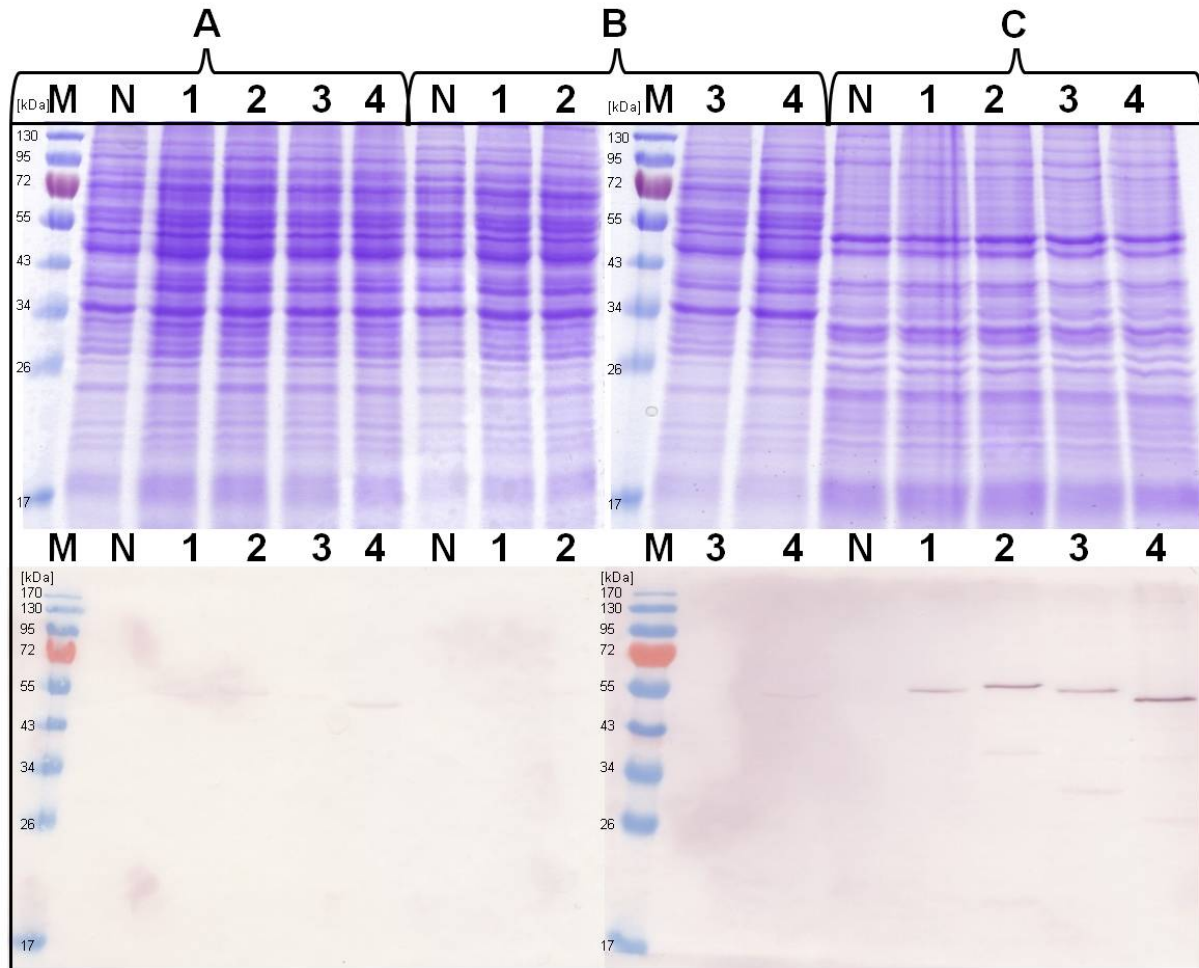

**Figure S2.** SDS PAGE (upper) and Western blot (lower) analysis of microsomal fractions from *Saccharomyces cerevisiae* clones expressing CYP-Arm1 (1), CYP-Arm2 (2), CYP-Arm3 (3) or CYP-Arm4 (4), compared with a negative control clone (N). (A) Direct protein extract post cell lysis. (B) Ultracentrifugation supernatant samples acquired in preparation of microsomal extract. (C) Correct localization of the proteins in the microsomal protein fraction and confirmation of the anticipated molecular weights.

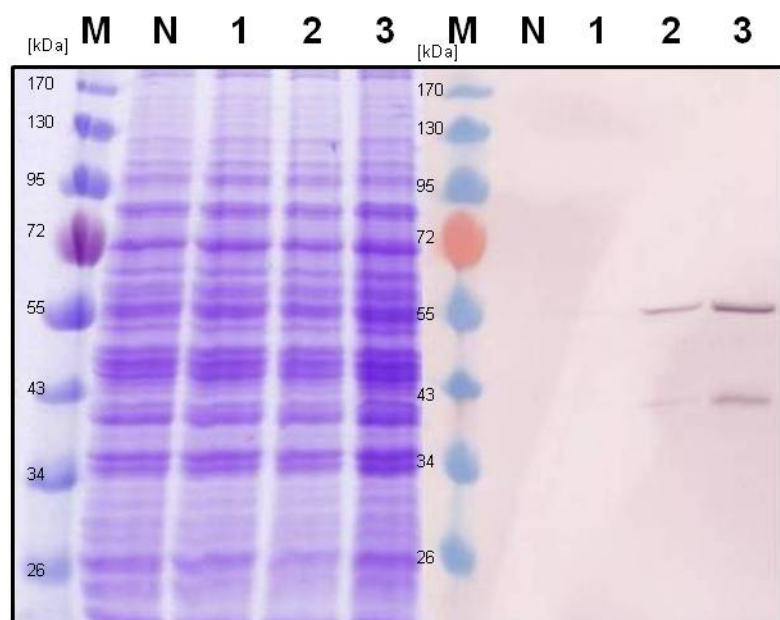

**Figure S3.** Western blot analysis of His<sub>6</sub>-tagged protoilludene synthase (40 kDa) and CYP-Arm3 (55 kDa) reveals stable expression in fermentation samples during the heterologous production of hydroxyprotoilludene. M = protein ladder; N = negative control; 1 = induction time point – addition of galactose; 2 = 2 h post-induction; 3 = 4 h post-induction. 2 mL fermentation samples lysed and clarified prior to 20µg of lysate loaded per lane.

**A**

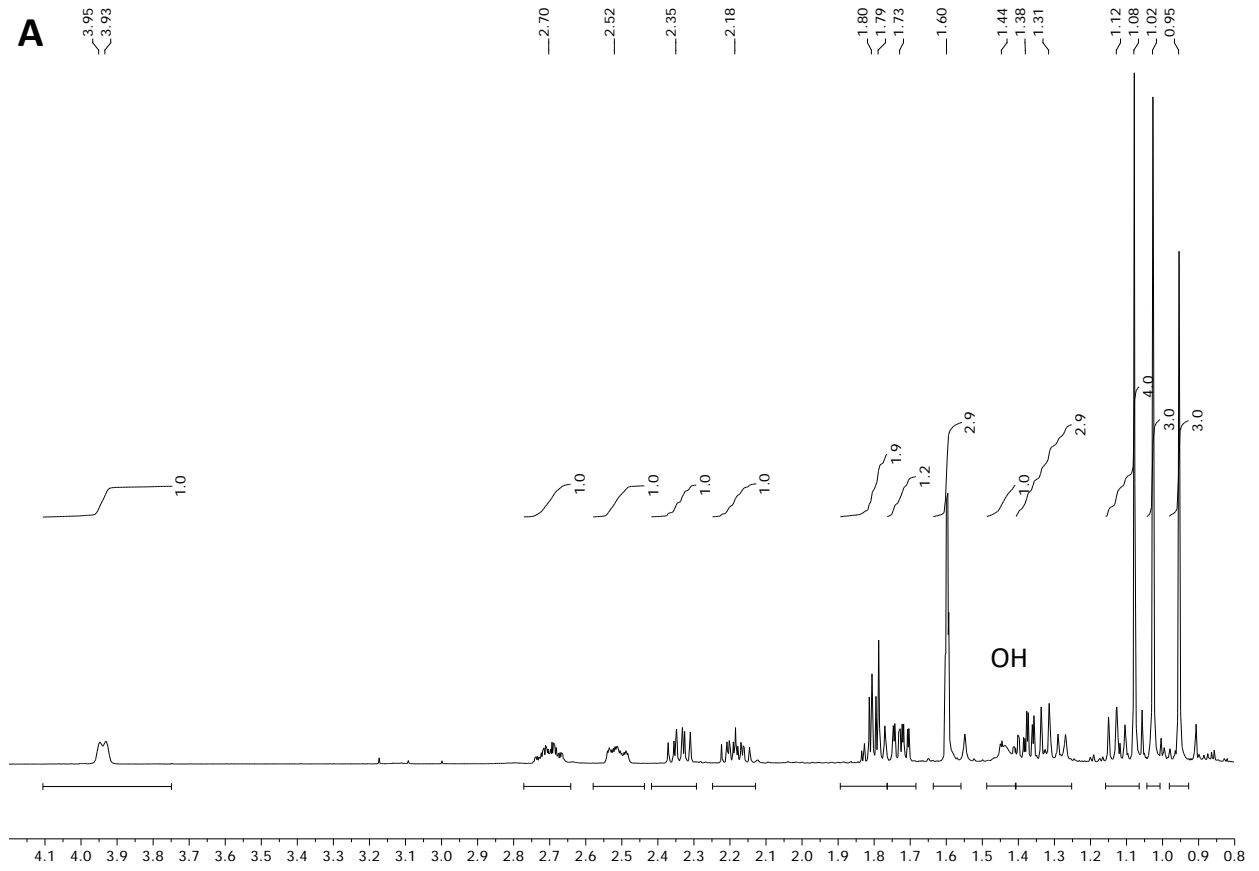

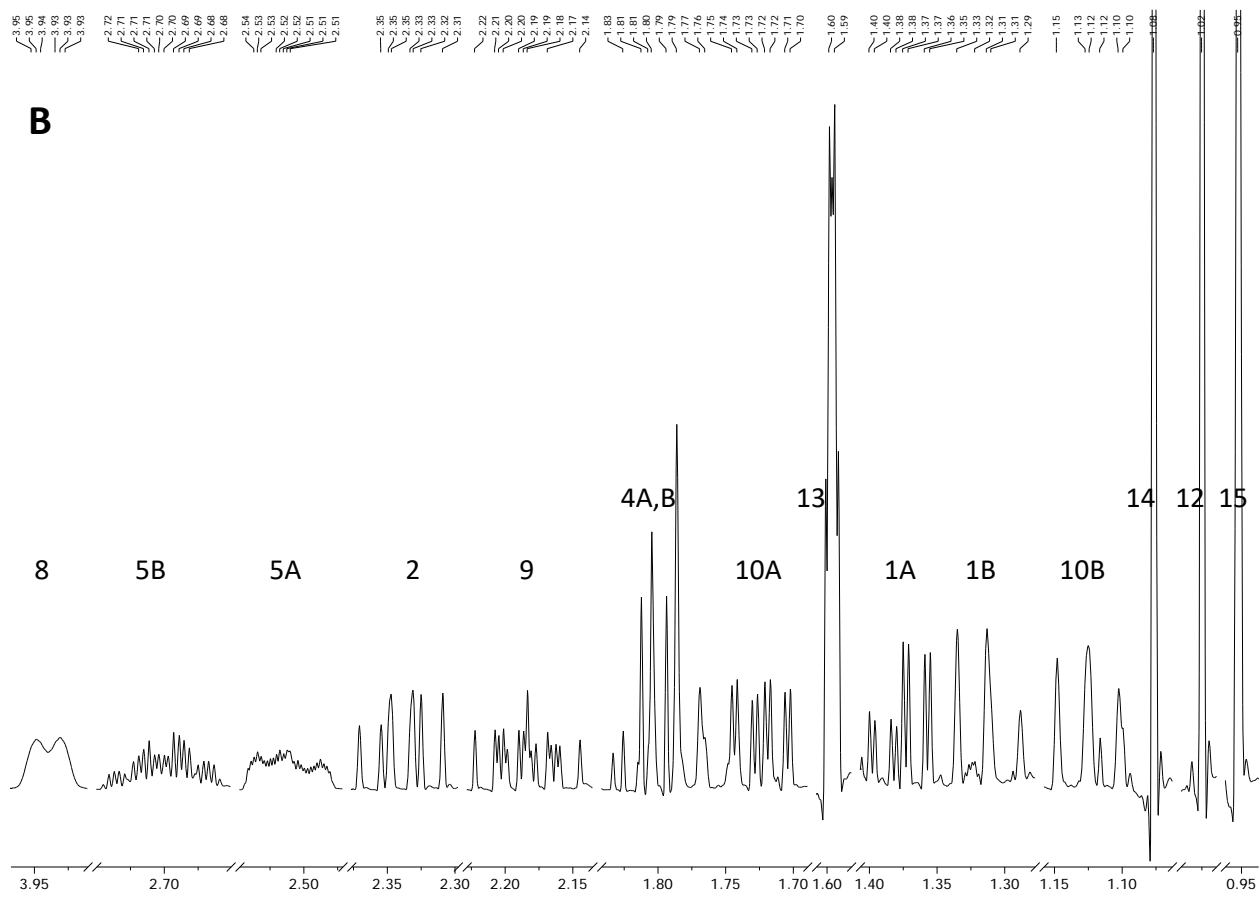

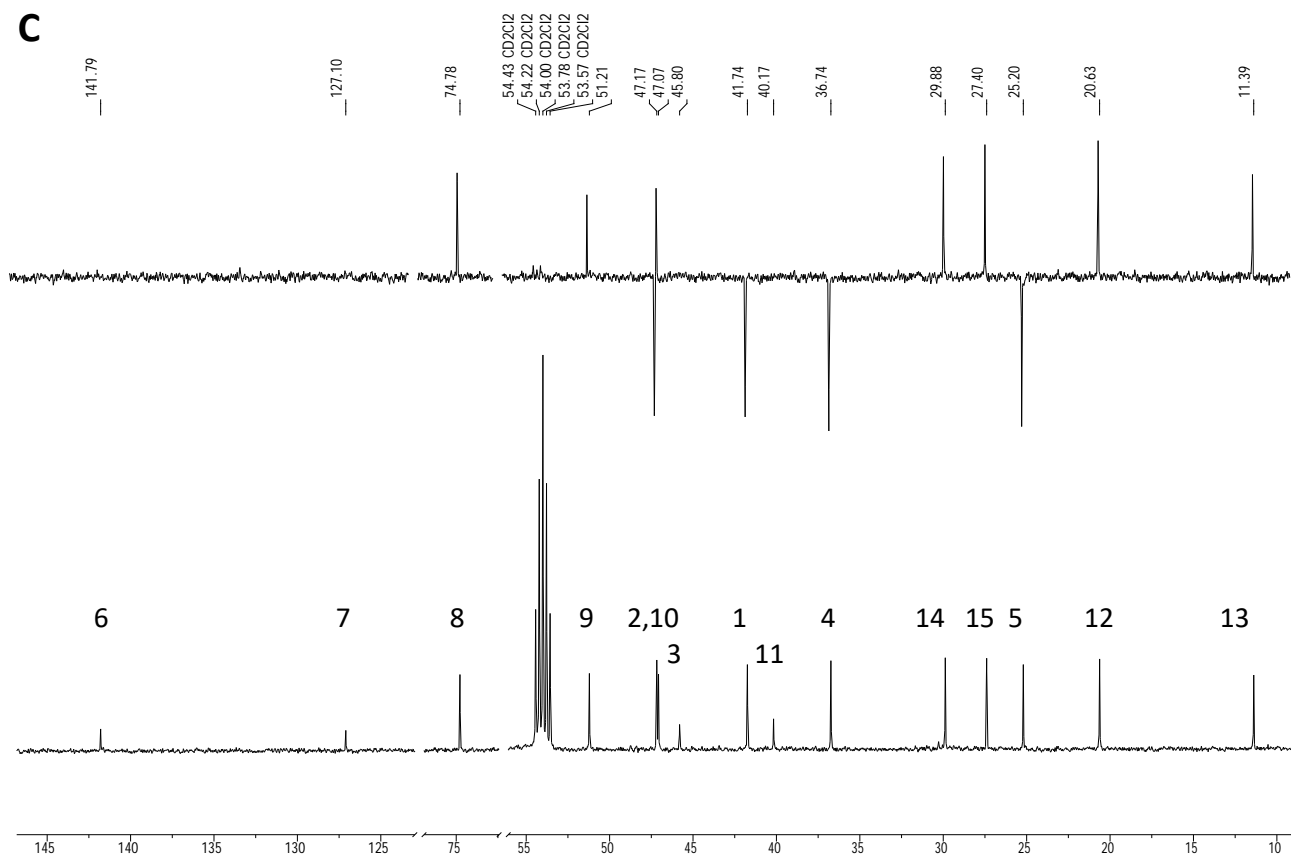

**Figure S4.** NMR spectra for the structural evaluation of the unknown hydroxyprotoilludene product, identifying it as 8 $\alpha$ -hydroxy-6-protoilludene. (A) <sup>1</sup>H NMR spectrum with integral identification. (B) <sup>13</sup>C NMR spectrum. (C) <sup>13</sup>C-DEPT<sub>135a</sub> NMR spectrum.

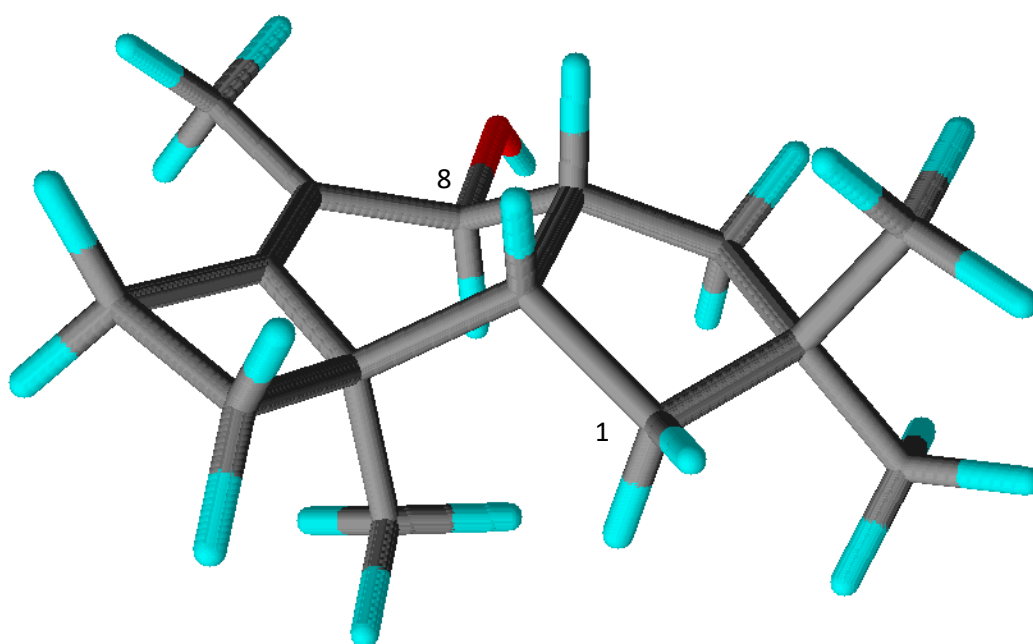

**Figure S5.** Molecular structure of 8 $\alpha$ -hydroxy-6-protoilludene.



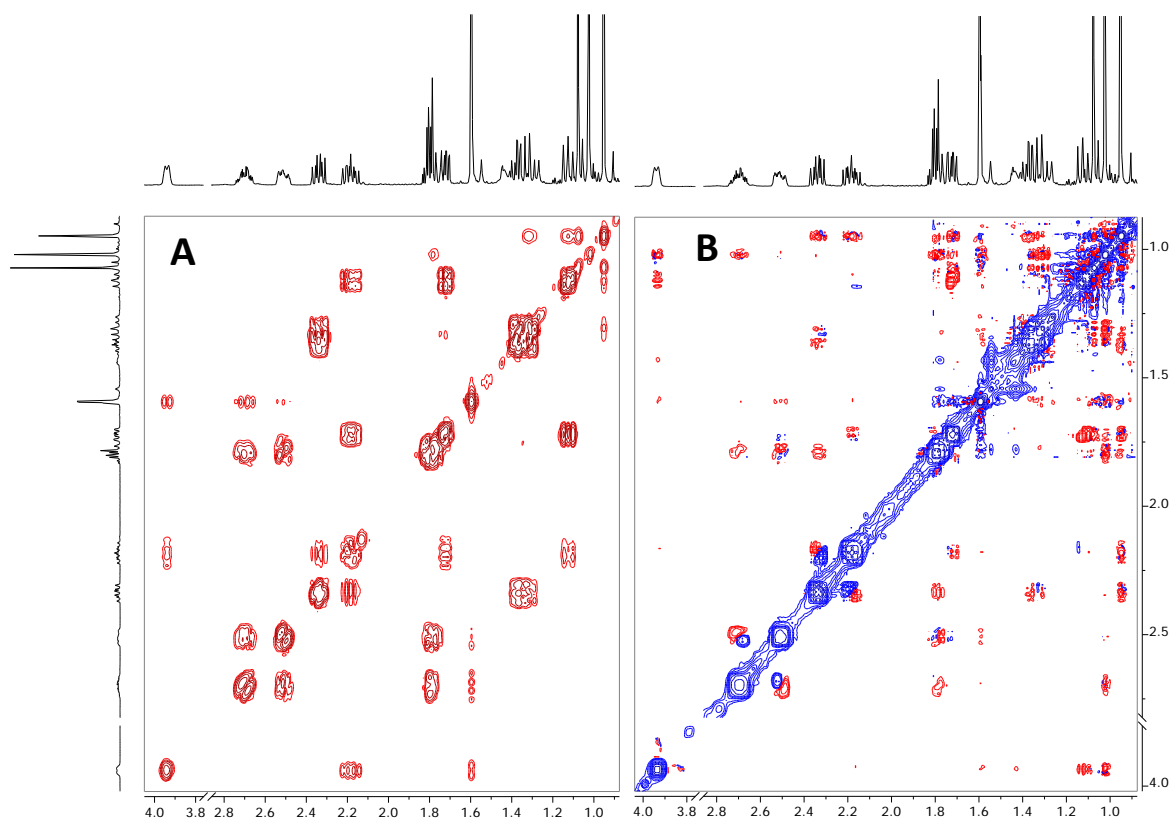

**Figure S6.** Two-dimensional NMR spectra for 8 $\alpha$ -hydroxy-6-protoilludene. (A) gs-COSYDF spectrum. (B) gs-NOESY spectrum.

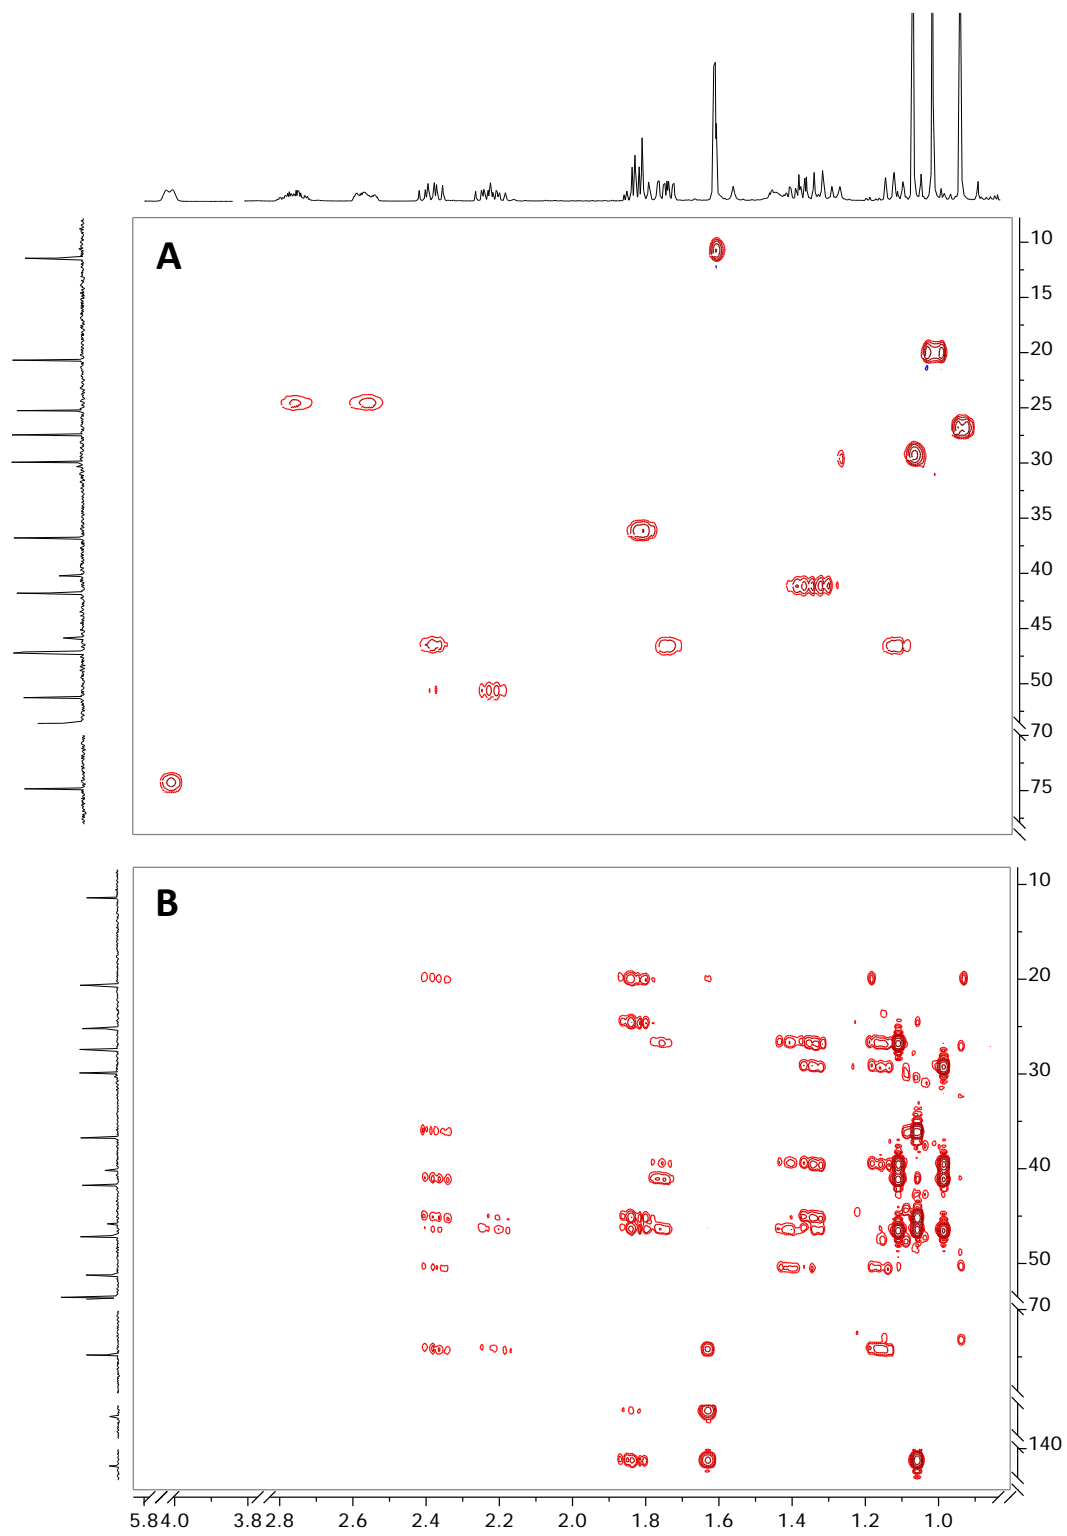

**Figure S7.** Heteronuclear NMR spectra for 8 $\alpha$ -hydroxy-6-protoilludene. (A) gs-HSQC spectrum. (B) gs-HMBC spectrum.

**Table S1 PCR primers for used for the generation of GenBank accession number MT277003.**

| Primer name      | Sequence               |
|------------------|------------------------|
| 5-1 T3 P1-1 for  | GGCATACCAGCCTTCTGCC    |
| 5-1 T3 P1-1b for | GATGCGCTTGATTGATGGGTC  |
| 5-1 T3 P1-2 for  | GCAGACGATGCGTGTGTCATC  |
| 5-1 T3 P1-3 for  | CCTGTAATACGCGTCCTTCTC  |
| 5-1 T3 P1-4 for  | CCCGTCGGCAAGCGAGTCGG   |
| 5-1 T3 P1-5 for  | CGATTAGAGGTGAGCTGGCTG  |
| 5-1 T3 P1-6 for  | CCTCGGTGCCGACATAGAAAG  |
| 5-1 T3 P1-7 for  | CGACGTTGCAAACGCACACATG |
| 5-1 S1 P2-1 for  | CGTTGCGAAGCGGAAGTGC    |
| 5-1 S1 P2-1 rev  | GAGTTACGCCAAGGTCGCGC   |
| 5-1 S1 P2-2 for  | CTGAGGGCGAGATGTTCGTC   |
| 5-1 S1 P2-3 for  | GAGATGTTTTCCGTATAGGATG |
| 5-1 S1 P2-4 for  | GGTGCTGATACGGTACAATTC  |
| 5-1 S1 P2-5 for  | GGATGACTGAAGTTGGCTGGG  |
| 5-1 S1 P2-6 for  | CCACCTCGGACCTCCAAACTTG |
| 5-1 S1 P2-7 for  | GGCCGTGAACAGGCTTCACC   |
| 5-1 S2 P3-1 for  | CGTGGTACGTTTCGGCTGTTG  |
| 5-1 S2 P3-1 rev  | CATCTACTTGTCATCTACAC   |
| 5-1 S2 P3-2 for  | GCAAGTCTCATCACCGGTATGC |
| 5-1 S2 P3-3 for  | GAGCCGATGAGATGGCAAATG  |

|                   |                           |
|-------------------|---------------------------|
| 5-1 S2 P3-4 for   | GGGATGTGTAAGGTCCTTCCAC    |
| 5-1 S2 P3-5 for   | GCAGAACTCGATGCTGTCGTTG    |
| 5-1 S2 P3-6 for   | GTAGAGTGTACTCCGCTGTAG     |
| 5-1 S2 P3-7 for   | CCTAGCAAATACCTACGCCG      |
| 5-1 T7 P4-1 for   | CTTTGACCAATCGACACTAG      |
| 5-1 T7 P4-1b for  | GCTGAGTCAAGCCGATGCAG      |
| 5-1 T7 P4-2 for   | CTACAGGTCGGTGTGATAGAGG    |
| 5-1 T7 P4-3 for   | CGGTAACAAGACACTGCTGG      |
| 5-1 T7 P4-4 for   | GACATCATAGAGTCGCCTGGG     |
| 5-1 T7 P4-5 for   | CACTTGCATCTGGCTGCCTGC     |
| 5-1 T7 P4-6 for   | CCATAGGCGTGTATCGTCCG      |
| 5-1 T7 P4-7 for   | CTCTGCCAGAACCCATACTCTG    |
| 27-2 T3 P1-1 for  | GAGACAAGGATGACAACGATACTC  |
| 27-2 T3 P1-2 for  | GTCAGCGGCATCCGAATCTGACG   |
| 27-2 T3 P1-3 for  | GACCGAGAGGCCTTCTCTCATC    |
| 27-2 T3 P1-4 for  | GTACGTGCACAACCATTGAATCC   |
| 27-2 T3 P1-5 for  | GACATAGCAATGATGCTTTGGGC   |
| 27-2 T3 P1-6 for  | CTTAACAGGTTCTGGGCTCCCGTTG |
| 27-2 T3 P1-7 for  | CCATCTTCCGCAATCTGCGAGCAG  |
| 27-2 T3 P1-7b for | GTGAAGGAGGGCTATTGTAGGGTG  |
| 27-2 T3 P1-7 rev  | CGTCGTTAGATGTCGGGGTCTCG   |
| 27-2 T3 P1-8 for  | CAGCGGTATCGTCTTTGTACCTG   |

|                   |                              |
|-------------------|------------------------------|
| 27-2 T3 P1-8b for | GCACCCGAAGATACCACAAAGACG     |
| 27-2 T3 P1-9 for  | CATGTAGCACTCTCGCCATCCTCGC    |
| 27-2 T3 P1-10 for | GTAGGGATAAGTTACGAGCCTTGAG    |
| 27-2 T3 P1-11 for | CACTACAATTCCCGTGGAGTTTTCTG   |
| 27-2 T3 P1-12 for | CACATCCTGTCTCCACTTCAAGCCGAG  |
| 27-2 T3 P1-13 for | GTCGGTGAATATCAGTTTCAATCTC    |
| 27-2 T3 P1-14 for | CAAGGTGGATGCTACGTGCGTTATC    |
| 27-2 T7 P2-1 for  | CCTTGACGGCTTATGGGAAGAG       |
| 27-2 T7 P2-2 for  | CCTACGACGAGCTTCACGAAGG       |
| 27-2 T7 P2-3 for  | CGATATACGGTATCAATTCGGGTGC    |
| 27-2 T7 P2-4 for  | GGTACCGATTAGGTGTGTACAGC      |
| 27-2 T7 P2-5 for  | GCCATCAGTGGGCACGCACTGATG     |
| 27-2 T7 P1-5b for | CAAGCTACAAGAAGGTATGTGATCC    |
| 27-2 T7 P2-6 for  | GACGCAAAGTTCGACGAGATGTGAC    |
| 27-2 T7 P2-7 for  | GCACAGTTACCAACCGCGATGCAAG    |
| 27-2 T7 P2-8 for  | CTCCTGTATCACCATTCGTATCTC     |
| 27-2 T7 P2-9 for  | CGCCGATCTCTTTGGTGAACCTGGATG  |
| 27-2 T7 P2-10 for | CGTGGGATATATCTGCGCTTTGCG     |
| 27-2 T7 P2-11 for | CAACGCATCATGTGTCGTCTTTCAGTGG |
| 27-2 T7 P2-12 for | GCTCACCGCCCTTCACGAATTAGCTC   |
| 27-2 T7 P2-13 for | CGGACACTCTTTAATACTCCTCGTTC   |
| 27-2 T7 P2-14 for | CGAAGTGGATTTCTGAAGTTGAGCTAC  |

|                   |                               |
|-------------------|-------------------------------|
| 27-2 T7 P2-15 for | GCATAGATGCTGCGTTACCTTCTGC     |
| 25-1 T3 P1-1 for  | GTCAACGTGGATGGGAATGATGATG     |
| 25-1 T3 P1-2 for  | CAGGAGTTTGATGGTGAAGCCTAGC     |
| 25-1 T3 P1-3 for  | GTGATACTTGCCCTTTAGATCTCG      |
| 25-1 T3 P1-4 for  | CGGTAGCACATCCTCCATTTATAACG    |
| 25-1 T3 P1-5 for  | GAAGGGAGGATTTATCTGGAGGGC      |
| 25-1 T3 P1-6 for  | GAATGGTTGCGACAGATTTGACGC      |
| 25-1 T3 P1-7 for  | GTATGTAGGTGGTACAGTATTGTAGACAG |
| 25-1 T3 P1-8 for  | CCATGGAGCCGTTTTGCCAGGTAGG     |
| 25-1 T3 P1-8 rev  | CATCAGTATAATCCTGTCCCTCAGC     |
| 25-1 T3 P1-9 for  | CATGTGGTGACCTCCTCCTTGAACGCTG  |
| 25-1 T3 P1-10 for | CAATACTGCCAAGGCAGTTGTCACCAG   |
| 25-1 T3 P1-11 for | GCTGATGAACCCAAGCGGATTAGAGAGG  |
| 25-1 T3 P1-12 for | GCTCTGTGCGGCGCTATTGCCTTTC     |
| 25-1 T3 P1-13 for | CTCTGTGGGGGAGTATGGGAAG        |
| 25-1 T3 P1-14 for | CTTCAAGATGCGGCCATTCTG         |
| 25-1 T3 P1-14 rev | CTTCATGTGATGCACCATGATAGC      |
| 25-1 T3 P1-15 for | GCTGAGTTTGGAGTAGACAGATTG      |
| 25-1 T7 P2-1 for  | CACGCAGGAGTTCTTCATATGTAATG    |
| 25-1 T7 P2-2 for  | GCAGCAATTGTCAGTGGTTATCACAG    |
| 25-1 T7 P2-3 for  | GTTGCCTGATATATCGACGTGGGAACG   |
| 25-1 T7 P2-4 for  | GCCTGTTGAGTTCGAAATTCTAACG     |

|                   |                              |
|-------------------|------------------------------|
| 25-1 T7 P2-5 for  | GTACCGTACGTACATTGATTCATG     |
| 25-1 T7 P2-6 for  | CGAATTGGCGTAACGCTGACCATG     |
| 25-1 T7 P2-7 for  | GAATTGGGACATCTTGCCACCACTC    |
| 25-1 T7 P2-8 for  | GGCTACAATGACTGGAATAAAATGCG   |
| 25-1 T7 P2-9 for  | GCCAAAGAGACCAGAATGGAAATGG    |
| 25-1 T7 P2-10 for | GAGTCTGTGAGTTCTACTTTGAGTGG   |
| 25-1 T7 P2-11 for | CTGTGGTCATTGAGAGATTGCTCACTC  |
| 25-1 T7 P2-12 for | CACAACTTGGAAATCTCTCAAGGCTAAC |
| 25-1 T7 P2-13 for | GCATCCAACAGAAAGCATGACAGCAC   |
| 25-1 T7 P2-14 for | CTGACTGTGATGGGGGAGATATCGG    |
| 25-1 T7 P2-15 for | CTGTCTCAGCAGCTTCGAGAAGG      |
| 25-1 T7 P2-15 rev | GTCTTTATTCTAGTCTCACGAGC      |

#### Genome walker PCR methods

Herculase II polymerase: 95°C 5min, (95°C 30s; 65°C\*30s; 72°C 5min) x 30 cycles, 72°C 10min

\*or alternative annealing temperature for primer pairs
